# Supplementary material for: Design, synthesis and antibacterial evaluation of a novel class of tetrahydrobenzothiophene derivatives
Source: Royal Society of Chemistry journal article supplement (doi:10.1039/d2md00373b), 2022-12-05

## Support information

### **Design, synthesis and Antibacterial Evaluation of a novel class of Tetrahydrobenzothiophene Derivatives**

Lin Lai<sup>a</sup>, Jinhua Yang<sup>a</sup>, Wanling Sun<sup>a</sup>, Xiaoyan Su<sup>a</sup>, Jun Chen<sup>a</sup>, Xinan Chen<sup>b</sup>,  
Shuchen Pei<sup>\*a</sup>

*<sup>a</sup>Key Laboratory of Industrial Fermentation Microorganism, Chongqing University of  
Science and Technology, Chongqing, 401331, China*

*<sup>b</sup> German Institute of Engineering, Chongqing College of Mobile Communtion,  
Chongqing, 401520, China*

*\*e-mail: peishuchen928@163.com*

# The compound characterization, <sup>1</sup>H and <sup>13</sup>C NMR spectra of new compounds

## Compound 3a

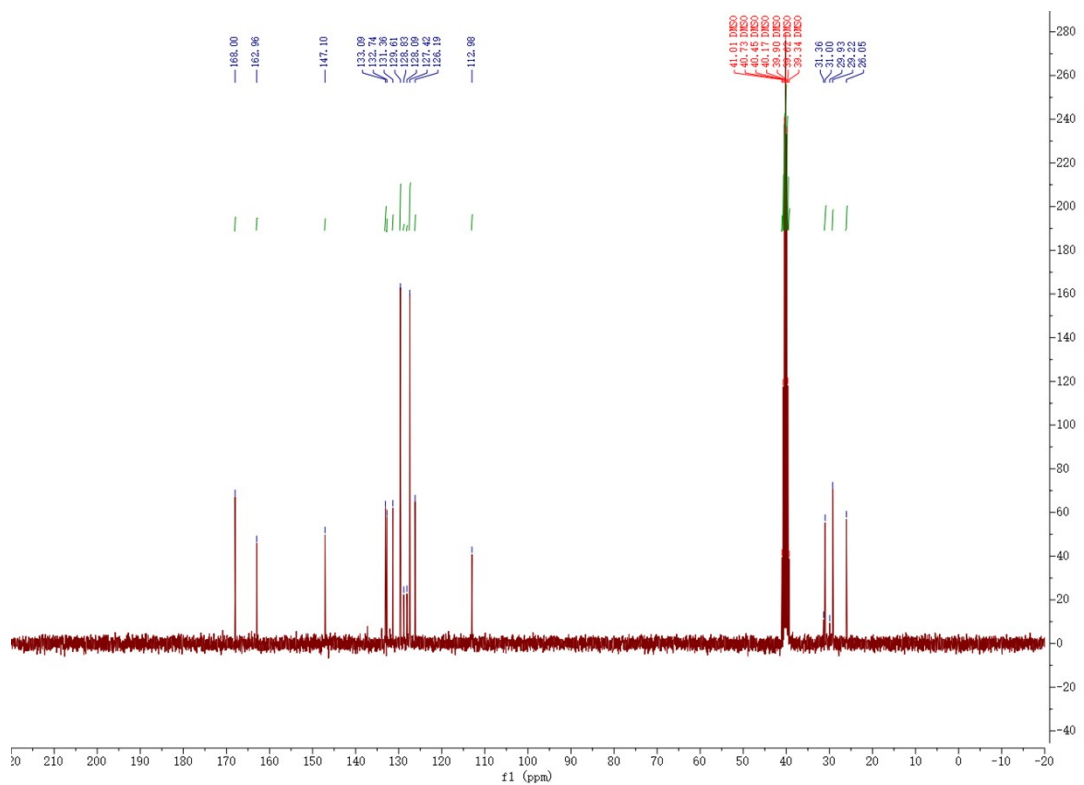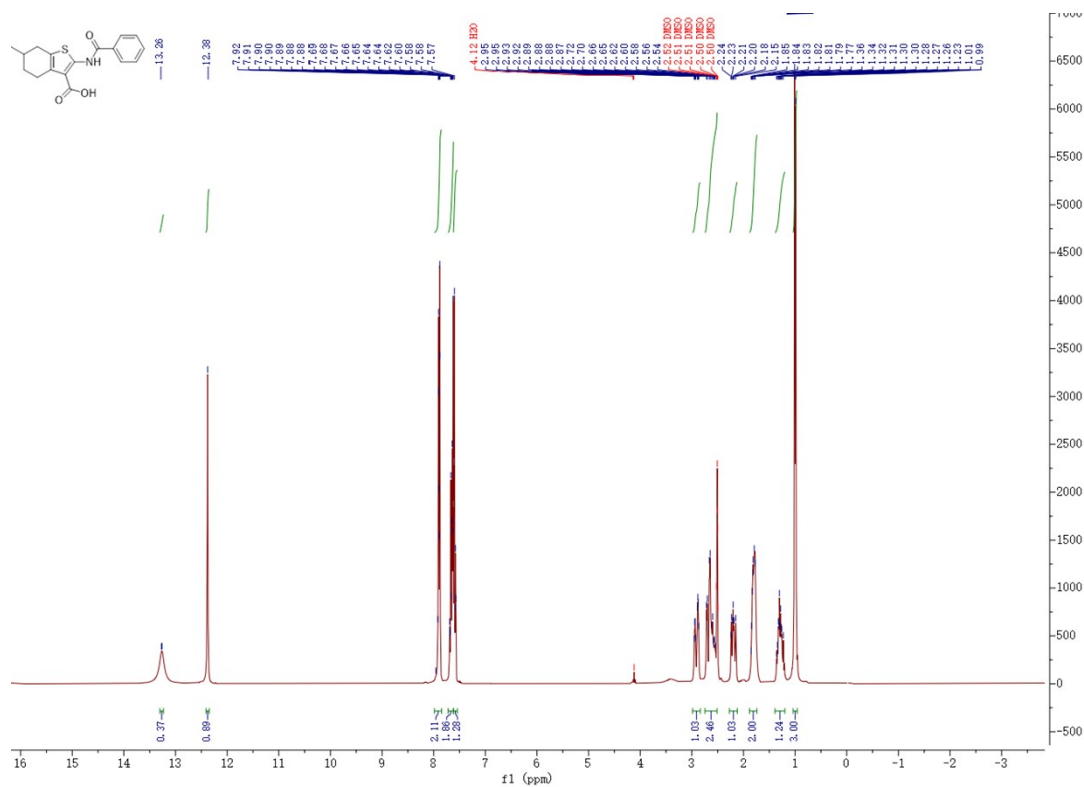

13C NMR spectrum of compound 10a in CDCl<sub>3</sub>. The x-axis represents the chemical shift in ppm (f1) from -20 to 230. The y-axis represents intensity from -20 to 140. The spectrum shows several sharp peaks in the aromatic region (110-145 ppm) and aliphatic region (25-40 ppm). A large solvent peak for CDCl<sub>3</sub> is visible at 77.0 ppm. Labeled peaks with their chemical shifts are: 167.62, 165.47, 146.07, 140.59, 140.41, 132.80, 131.46, 130.85, 129.00, 126.89, 113.38, 93.87, 56.51, 40.83, 40.60, 40.56, 40.28, 39.98, 39.44, 32.29, 30.98, and 26.11 ppm.

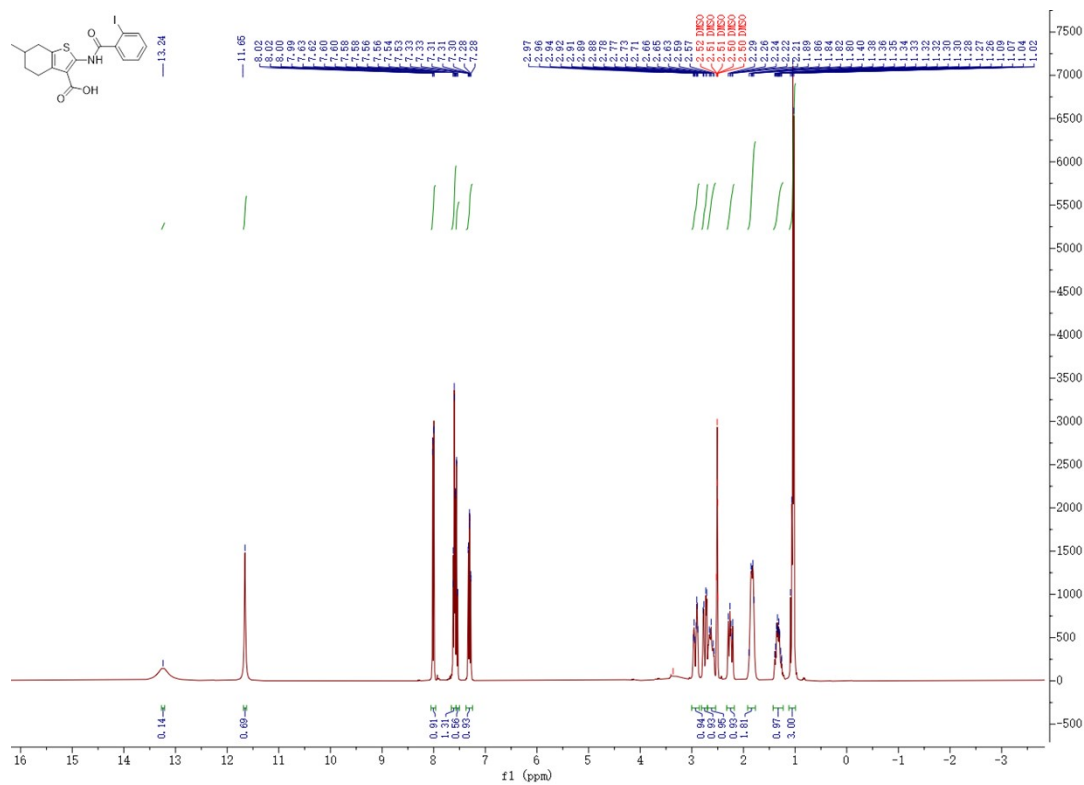

[illegible]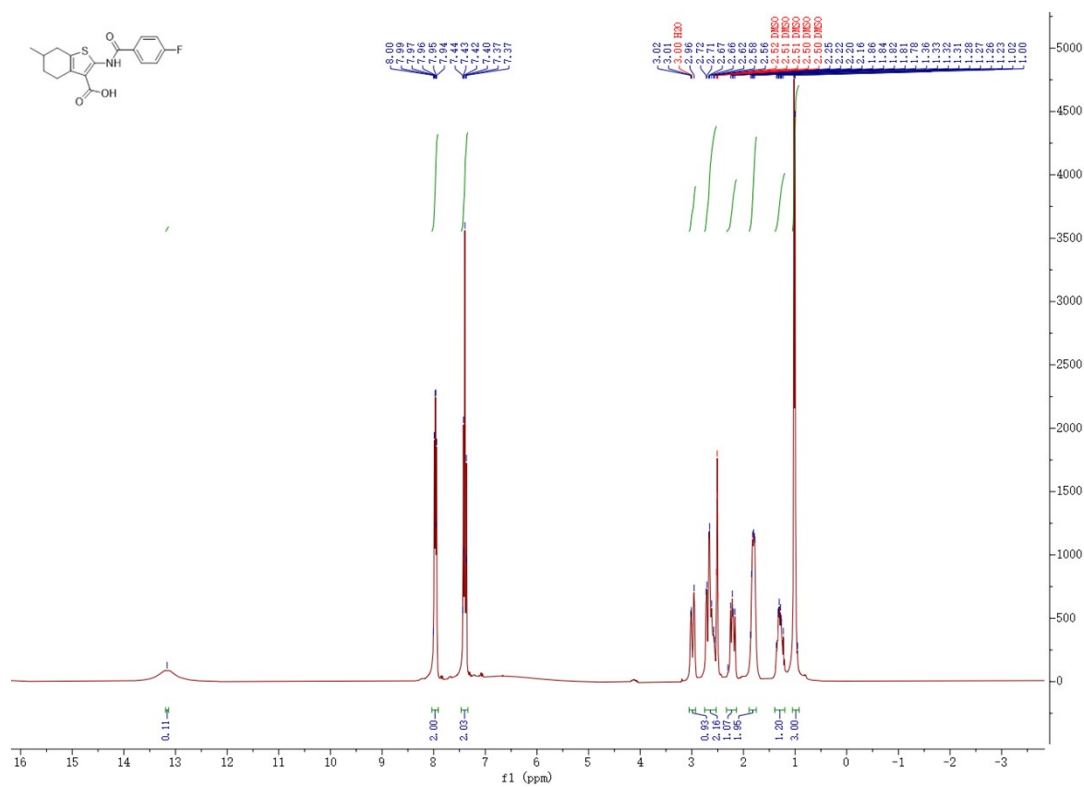

# Compound 3d

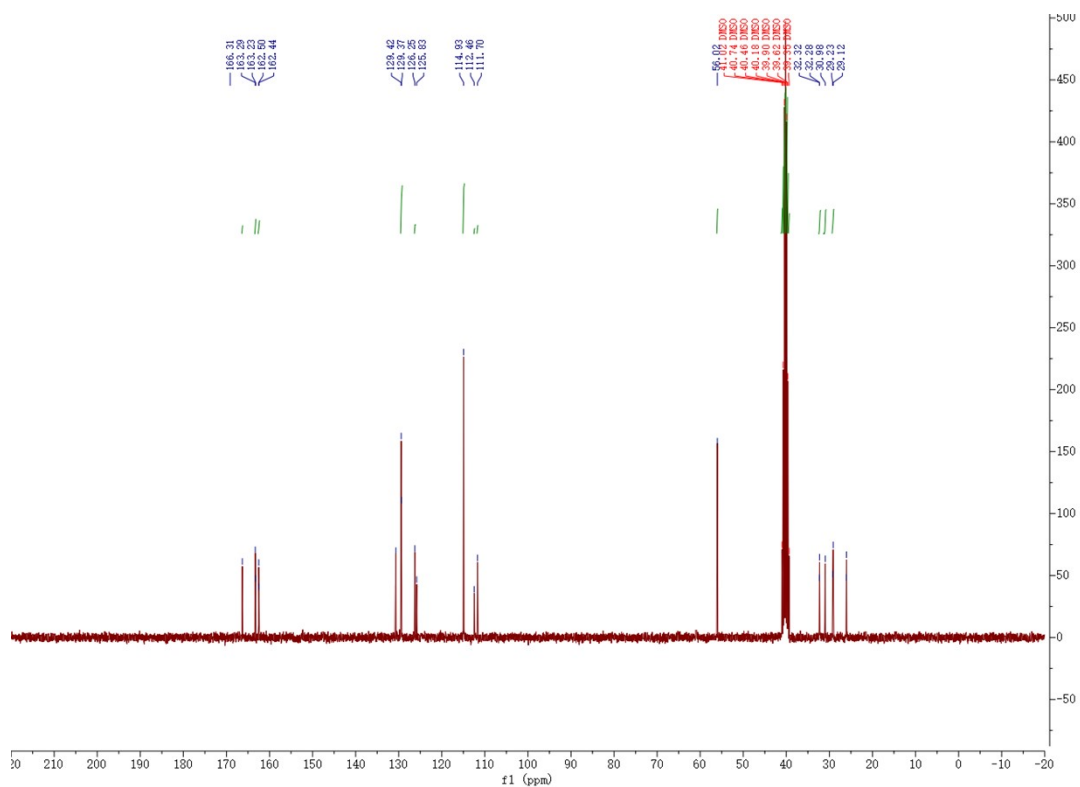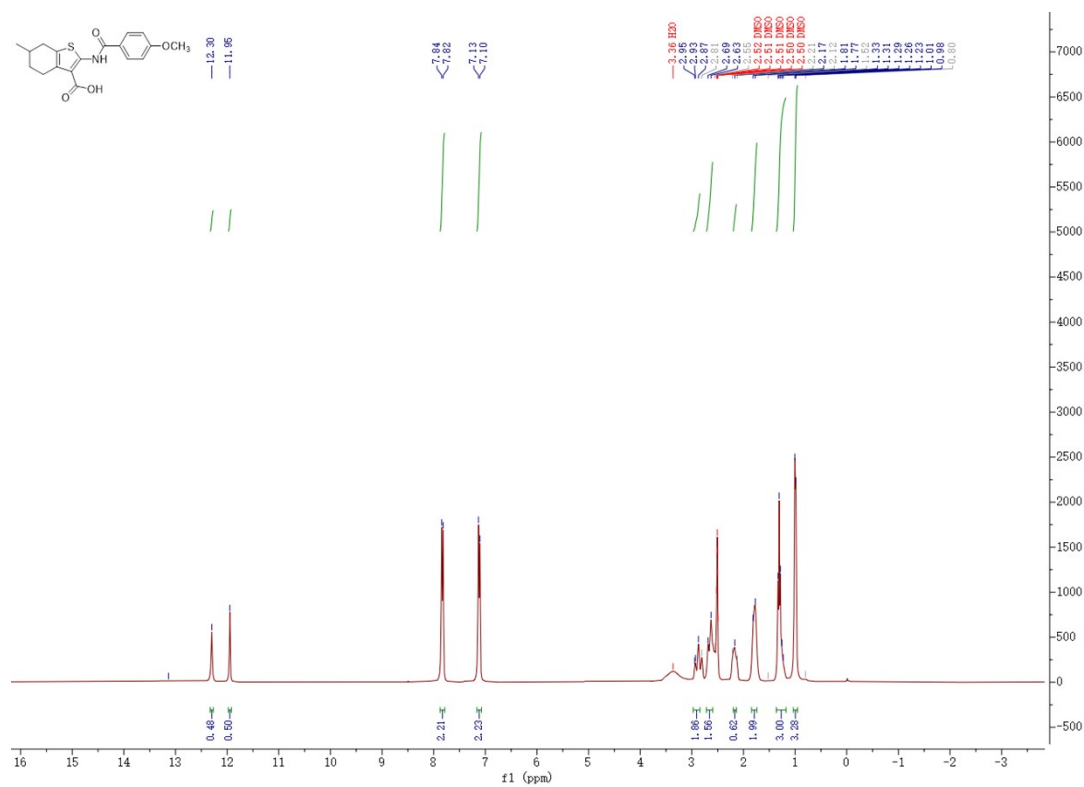

# Compound 3e

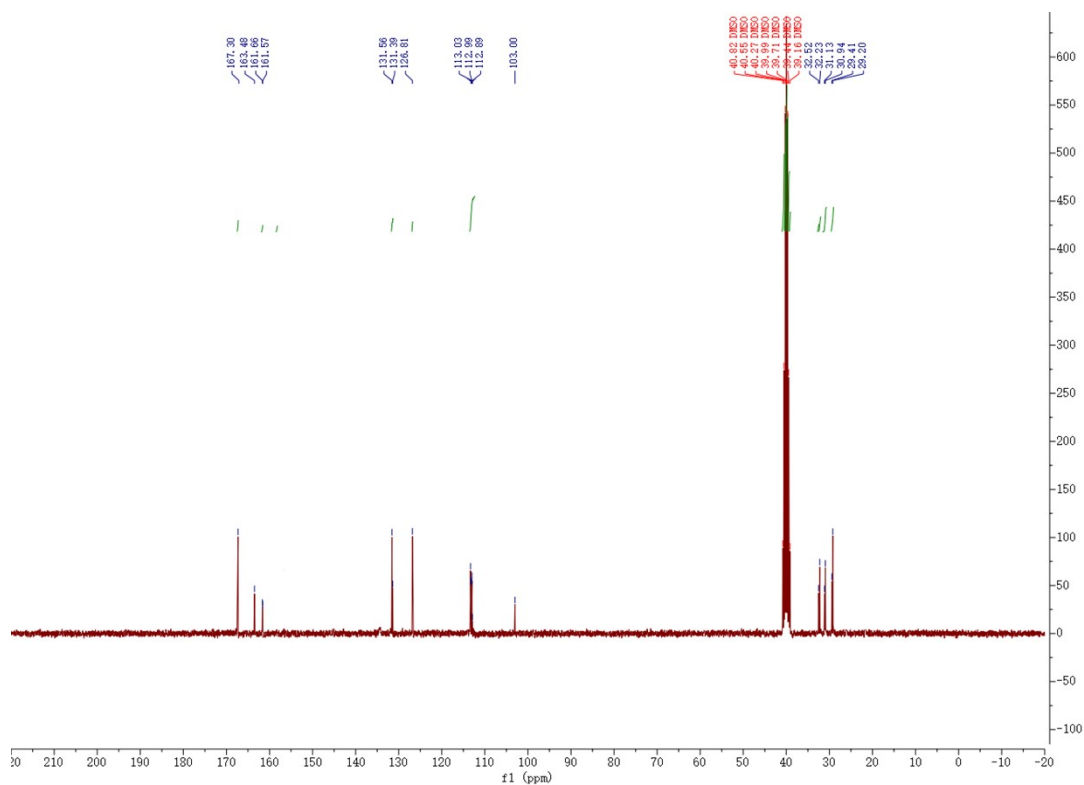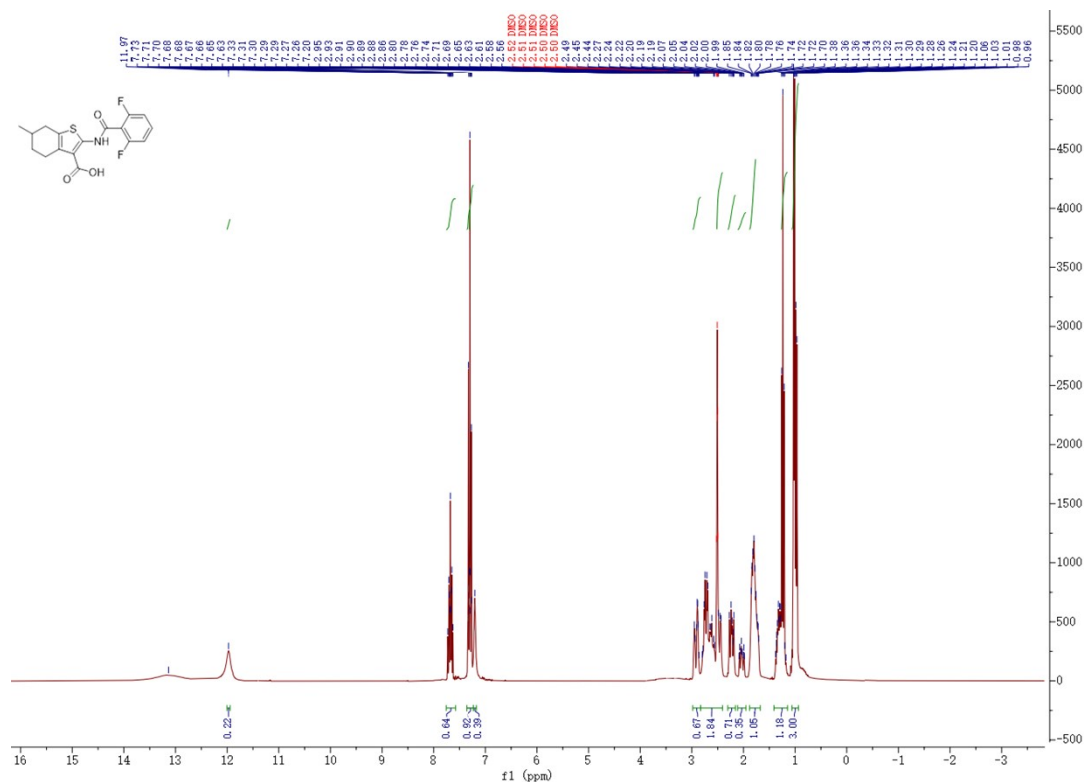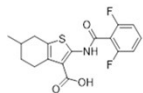

# Compound 3f

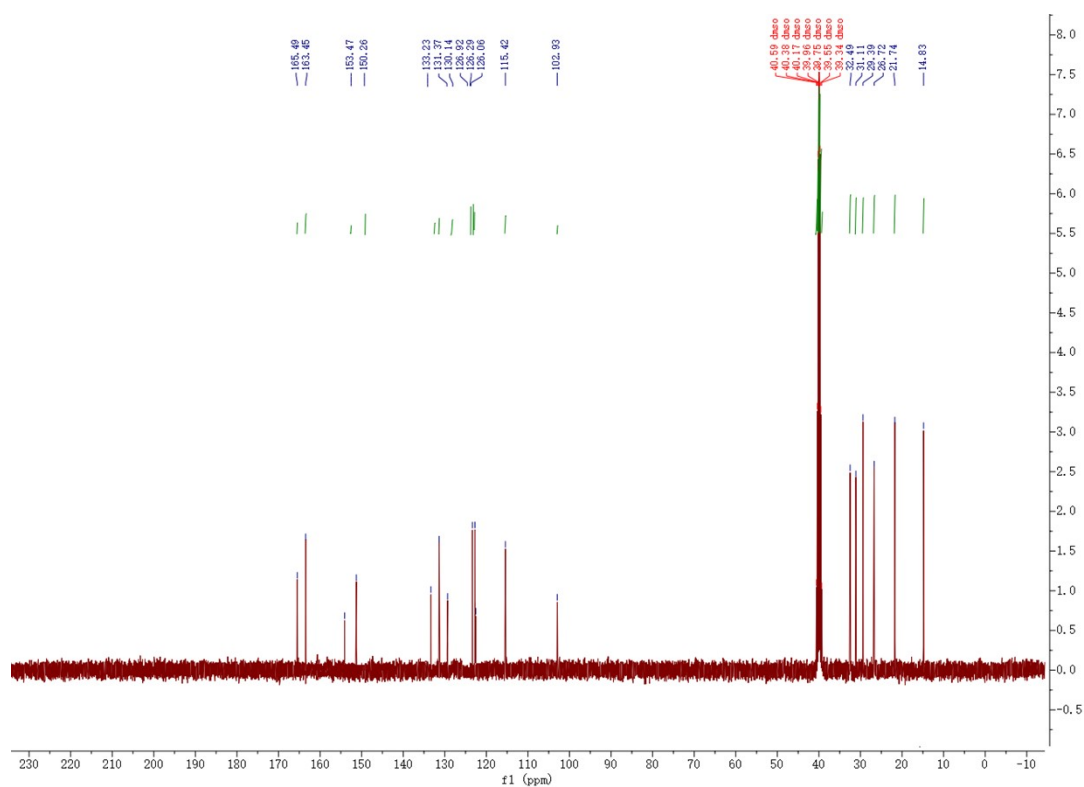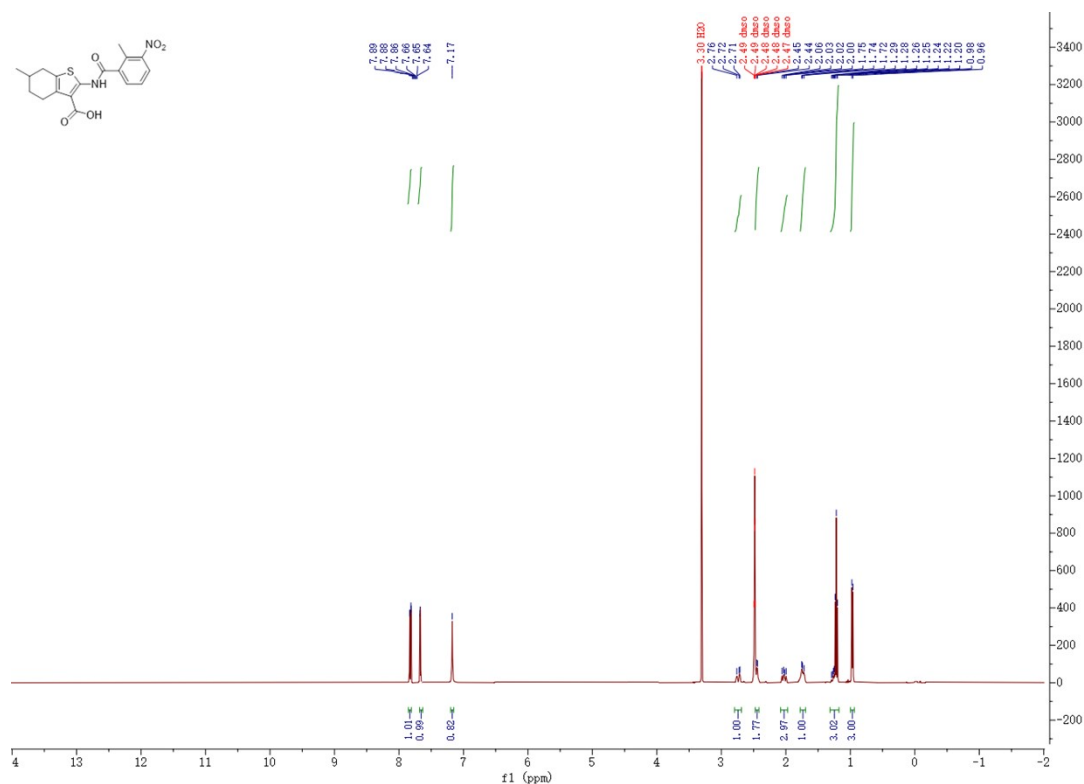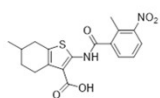

# Compound 3g

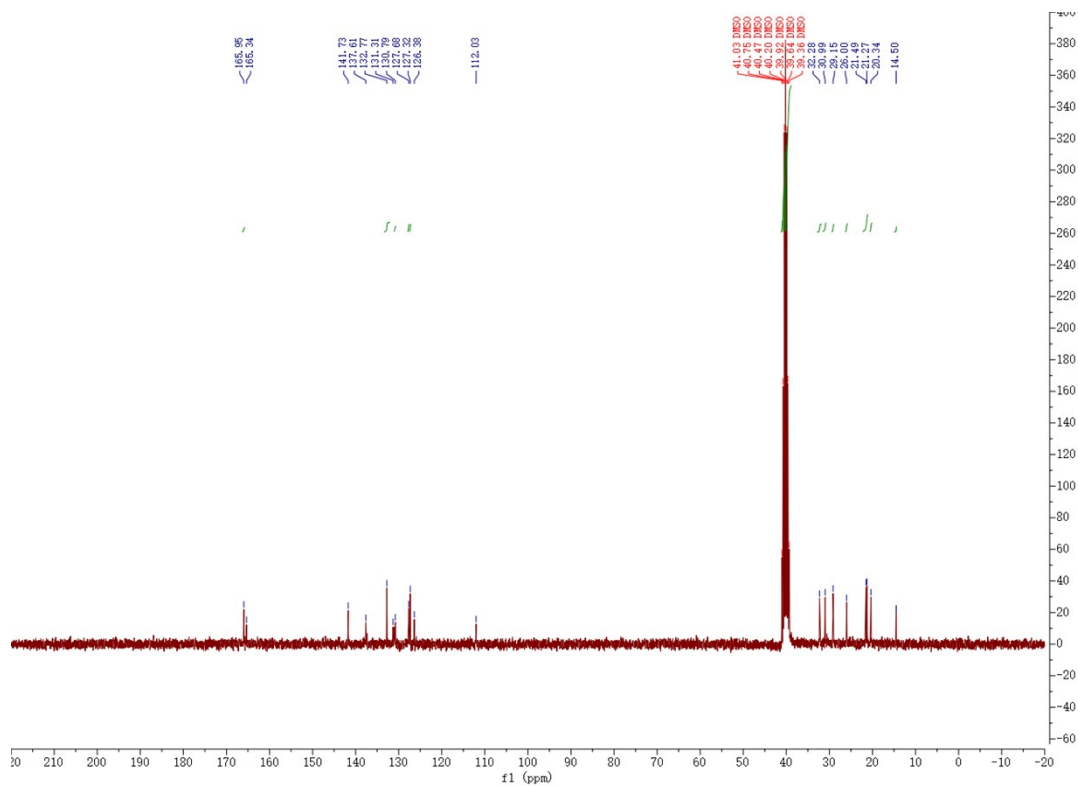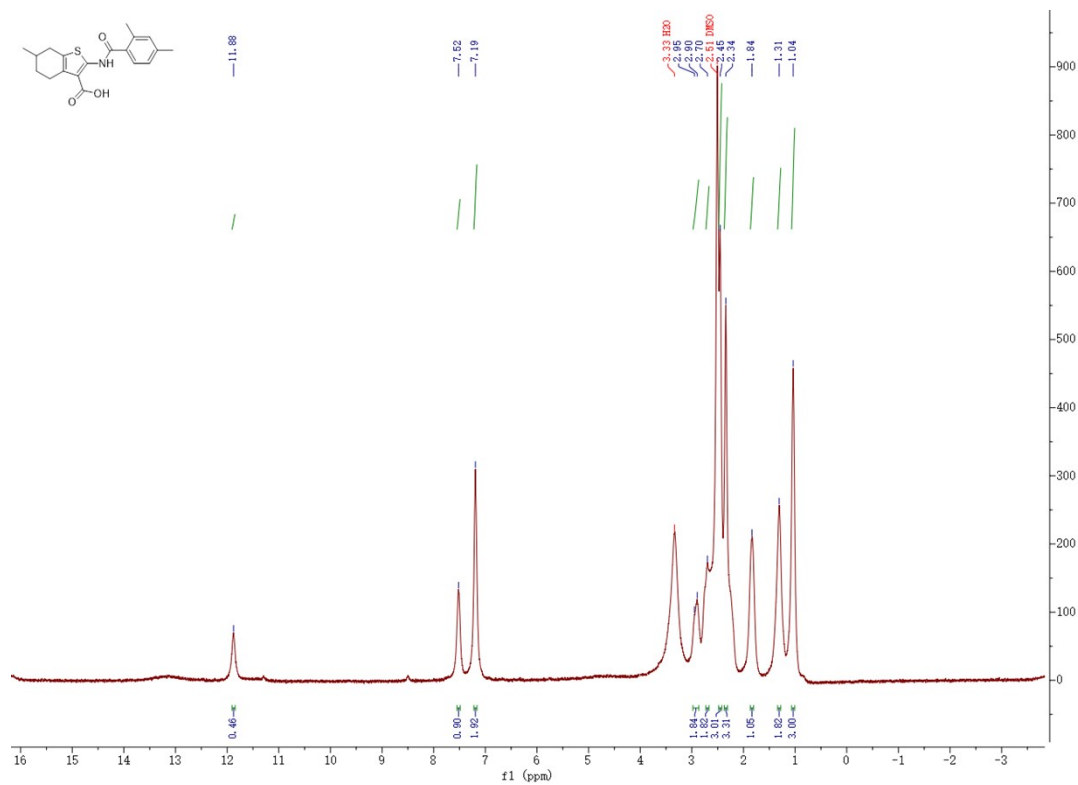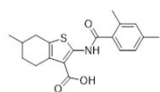



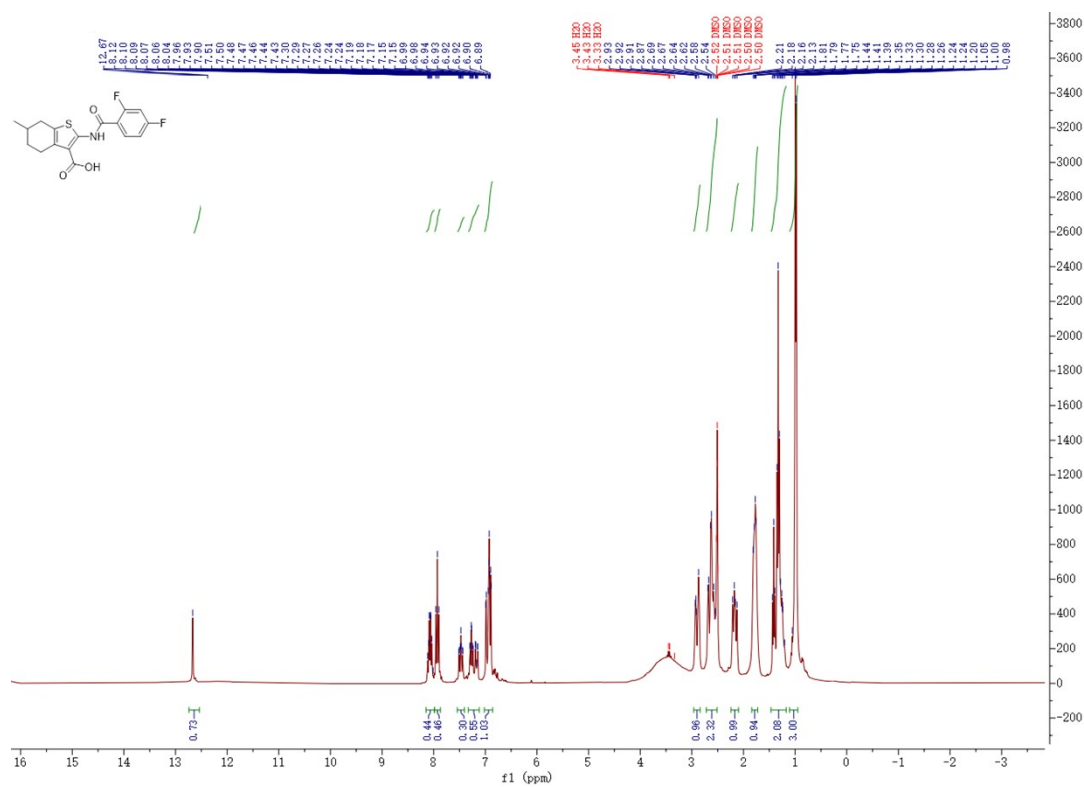

<sup>13</sup>C NMR spectrum (400 MHz, DMSO-d<sub>6</sub>) of compound 10. The x-axis represents the chemical shift in ppm, ranging from -20 to 230. The y-axis represents intensity. The spectrum shows several peaks in the aromatic region (110-160 ppm) and aliphatic region (20-40 ppm). A large solvent peak for DMSO-d<sub>6</sub> is visible at approximately 40 ppm. Labeled peaks are indicated by blue and green lines with corresponding chemical shift values.

Chemical shift values (ppm) for labeled peaks:

- 163.46, 160.66, 158.51, 157.36
- 131.13, 130.97, 128.77, 128.73, 127.36, 126.96
- 119.54
- 102.97
- 40.78 (DMSO), 40.74 (DMSO), 40.70 (DMSO), 40.34 (DMSO), 40.22 (DMSO), 39.66 (DMSO), 39.47 (DMSO), 39.43 (DMSO), 39.39 (DMSO), 39.35 (DMSO), 39.31 (DMSO), 39.27 (DMSO), 39.23 (DMSO), 39.19 (DMSO), 39.15 (DMSO), 39.11 (DMSO), 39.07 (DMSO), 39.03 (DMSO), 38.99 (DMSO), 38.95 (DMSO), 38.91 (DMSO), 38.87 (DMSO), 38.83 (DMSO), 38.79 (DMSO), 38.75 (DMSO), 38.71 (DMSO), 38.67 (DMSO), 38.63 (DMSO), 38.59 (DMSO), 38.55 (DMSO), 38.51 (DMSO), 38.47 (DMSO), 38.43 (DMSO), 38.39 (DMSO), 38.35 (DMSO), 38.31 (DMSO), 38.27 (DMSO), 38.23 (DMSO), 38.19 (DMSO), 38.15 (DMSO), 38.11 (DMSO), 38.07 (DMSO), 38.03 (DMSO), 38.00 (DMSO), 37.96 (DMSO), 37.92 (DMSO), 37.88 (DMSO), 37.84 (DMSO), 37.80 (DMSO), 37.76 (DMSO), 37.72 (DMSO), 37.68 (DMSO), 37.64 (DMSO), 37.60 (DMSO), 37.56 (DMSO), 37.52 (DMSO), 37.48 (DMSO), 37.44 (DMSO), 37.40 (DMSO), 37.36 (DMSO), 37.32 (DMSO), 37.28 (DMSO), 37.24 (DMSO), 37.20 (DMSO), 37.16 (DMSO), 37.12 (DMSO), 37.08 (DMSO), 37.04 (DMSO), 37.00 (DMSO), 36.96 (DMSO), 36.92 (DMSO), 36.88 (DMSO), 36.84 (DMSO), 36.80 (DMSO), 36.76 (DMSO), 36.72 (DMSO), 36.68 (DMSO), 36.64 (DMSO), 36.60 (DMSO), 36.56 (DMSO), 36.52 (DMSO), 36.48 (DMSO), 36.44 (DMSO), 36.40 (DMSO), 36.36 (DMSO), 36.32 (DMSO), 36.28 (DMSO), 36.24 (DMSO), 36.20 (DMSO), 36.16 (DMSO), 36.12 (DMSO), 36.08 (DMSO), 36.04 (DMSO), 36.00 (DMSO), 35.96 (DMSO), 35.92 (DMSO), 35.88 (DMSO), 35.84 (DMSO), 35.80 (DMSO), 35.76 (DMSO), 35.72 (DMSO), 35.68 (DMSO), 35.64 (DMSO), 35.60 (DMSO), 35.56 (DMSO), 35.52 (DMSO), 35.48 (DMSO), 35.44 (DMSO), 35.40 (DMSO), 35.36 (DMSO), 35.32 (DMSO), 35.28 (DMSO), 35.24 (DMSO), 35.20 (DMSO), 35.16 (DMSO), 35.12 (DMSO), 35.08 (DMSO), 35.04 (DMSO), 35.00 (DMSO), 34.96 (DMSO), 34.92 (DMSO), 34.88 (DMSO), 34.84 (DMSO), 34.80 (DMSO), 34.76 (DMSO), 34.72 (DMSO), 34.68 (DMSO), 34.64 (DMSO), 34.60 (DMSO), 34.56 (DMSO), 34.52 (DMSO), 34.48 (DMSO), 34.44 (DMSO), 34.40 (DMSO), 34.36 (DMSO), 34.32 (DMSO), 34.28 (DMSO), 34.24 (DMSO), 34.20 (DMSO), 34.16 (DMSO), 34.12 (DMSO), 34.08 (DMSO), 34.04 (DMSO), 34.00 (DMSO), 33.96 (DMSO), 33.92 (DMSO), 33.88 (DMSO), 33.84 (DMSO), 33.80 (DMSO), 33.76 (DMSO), 33.72 (DMSO), 33.68 (DMSO), 33.64 (DMSO), 33.60 (DMSO), 33.56 (DMSO), 33.52 (DMSO), 33.48 (DMSO), 33.44 (DMSO), 33.40 (DMSO), 33.36 (DMSO), 33.32 (DMSO), 33.28 (DMSO), 33.24 (DMSO), 33.20 (DMSO), 33.16 (DMSO), 33.12 (DMSO), 33.08 (DMSO), 33.04 (DMSO), 33.00 (DMSO), 32.96 (DMSO), 32.92 (DMSO), 32.88 (DMSO), 32.84 (DMSO), 32.80 (DMSO), 32.76 (DMSO), 32.72 (DMSO), 32.68 (DMSO), 32.64 (DMSO), 32.60 (DMSO), 32.56 (DMSO), 32.52 (DMSO), 32.48 (DMSO), 32.44 (DMSO), 32.40 (DMSO), 32.36 (DMSO), 32.32 (DMSO), 32.28 (DMSO), 32.24 (DMSO), 32.20 (DMSO), 32.16 (DMSO), 32.12 (DMSO), 32.08 (DMSO), 32.04 (DMSO), 32.00 (DMSO), 31.96 (DMSO), 31.92 (DMSO), 31.88 (DMSO), 31.84 (DMSO), 31.80 (DMSO), 31.76 (DMSO), 31.72 (DMSO), 31.68 (DMSO), 31.64 (DMSO), 31.60 (DMSO), 31.56 (DMSO), 31.52 (DMSO), 31.48 (DMSO), 31.44 (DMSO), 31.40 (DMSO), 31.36 (DMSO), 31.32 (DMSO), 31.28 (DMSO), 31.24 (DMSO), 31.20 (DMSO), 31.16 (DMSO), 31.12 (DMSO), 31.08 (DMSO), 31.04 (DMSO), 31.00 (DMSO), 30.96 (DMSO), 30.92 (DMSO), 30.88 (DMSO), 30.84 (DMSO), 30.80 (DMSO), 30.76 (DMSO), 30.72 (DMSO), 30.68 (DMSO), 30.64 (DMSO), 30.60 (DMSO), 30.56 (DMSO), 30.52 (DMSO), 30.48 (DMSO), 30.44 (DMSO), 30.40 (DMSO), 30.36 (DMSO), 30.32 (DMSO), 30.28 (DMSO), 30.24 (DMSO), 30.20 (DMSO), 30.16 (DMSO), 30.12 (DMSO), 30.08 (DMSO), 30.04 (DMSO), 30.00 (DMSO), 29.96 (DMSO), 29.92 (DMSO), 29.88 (DMSO), 29.84 (DMSO), 29.80 (DMSO), 29.76 (DMSO), 29.72 (DMSO), 29.68 (DMSO), 29.64 (DMSO), 29.60 (DMSO), 29.56 (DMSO), 29.52 (DMSO), 29.48 (DMSO), 29.44 (DMSO), 29.40 (DMSO), 29.36 (DMSO), 29.32 (DMSO), 29.28 (DMSO), 29.24 (DMSO), 29.20 (DMSO), 29.16 (DMSO), 29.12 (DMSO), 29.08 (DMSO), 29.04 (DMSO), 29.00 (DMSO), 28.96 (DMSO), 28.92 (DMSO), 28.88 (DMSO), 28.84 (DMSO), 28.80 (DMSO), 28.76 (DMSO), 28.72 (DMSO), 28.68 (DMSO), 28.64 (DMSO), 28.60 (DMSO), 28.56 (DMSO), 28.52 (DMSO), 28.48 (DMSO), 28.44 (DMSO), 28.40 (DMSO), 28.36 (DMSO), 28.32 (DMSO), 28.28 (DMSO), 28.24 (DMSO), 28.20 (DMSO), 28.16 (DMSO), 28.12 (DMSO), 28.08 (DMSO), 28.04 (DMSO), 28.00 (DMSO), 27.96 (DMSO), 27.92 (DMSO), 27.88 (DMSO), 27.84 (DMSO), 27.80 (DMSO), 27.76 (DMSO), 27.72 (DMSO), 27.68 (DMSO), 27.64 (DMSO), 27.60 (DMSO), 27.56 (DMSO), 27.52 (DMSO), 27.48 (DMSO), 27.44 (DMSO), 27.40 (DMSO), 27.36 (DMSO), 27.32 (DMSO), 27.28 (DMSO), 27.24 (DMSO), 27.20 (DMSO), 27.16 (DMSO), 27.12 (DMSO), 27.08 (DMSO), 27.04 (DMSO), 27.00 (DMSO), 26.96 (DMSO), 26.92 (DMSO), 26.88 (DMSO), 26.84 (DMSO), 26.80 (DMSO), 26.76 (DMSO), 26.72 (DMSO), 26.68 (DMSO), 26.64 (DMSO), 26.60 (DMSO), 26.56 (DMSO), 26.52 (DMSO), 26.48 (DMSO), 26.44 (DMSO), 26.40 (DMSO), 26.36 (DMSO), 26.32 (DMSO), 26.28 (DMSO), 26.24 (DMSO), 26.

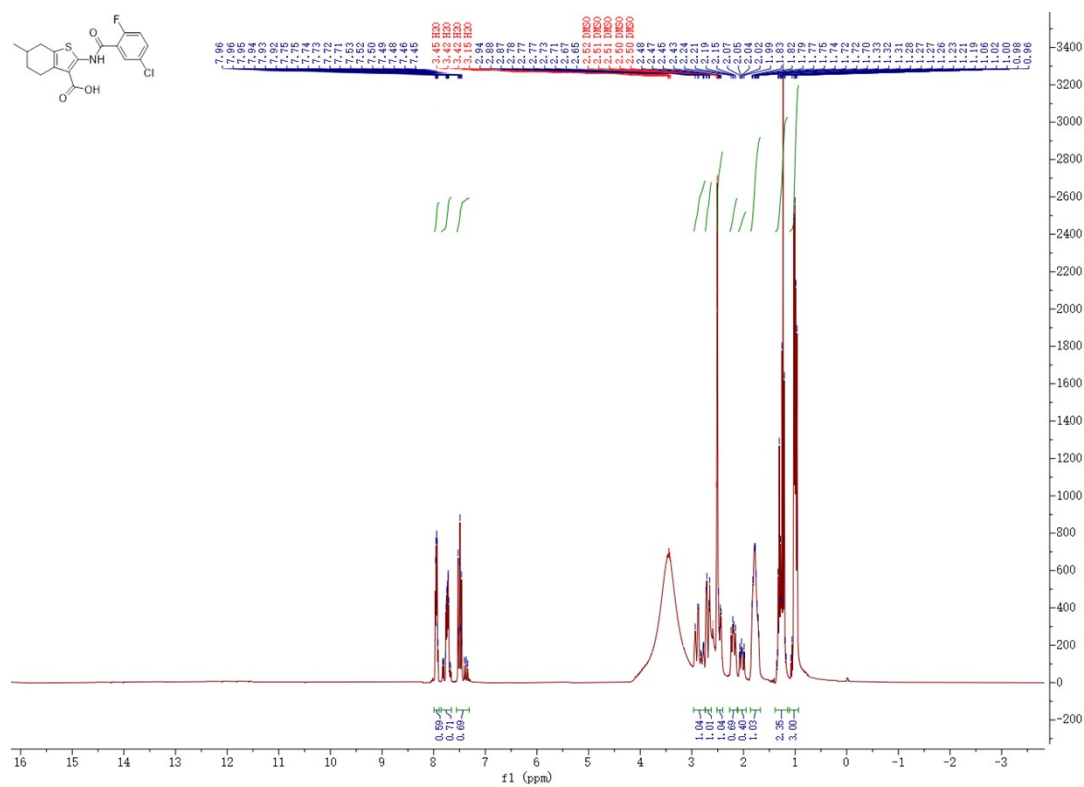

[illegible]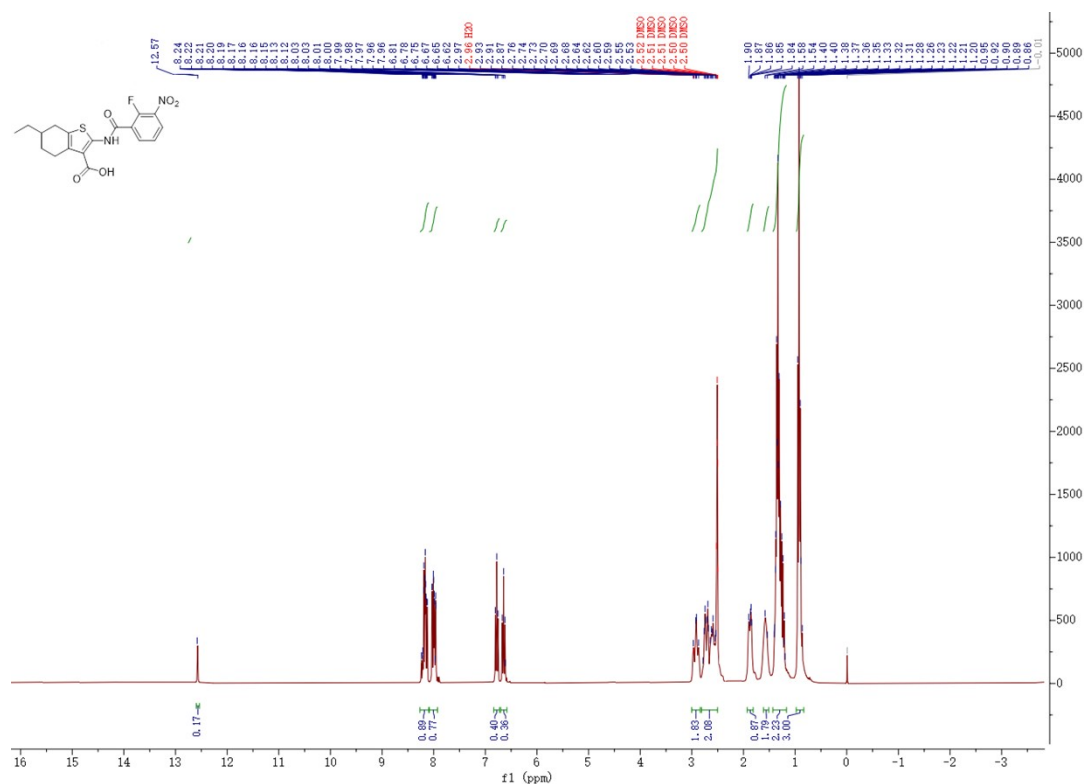

# Compound 3k

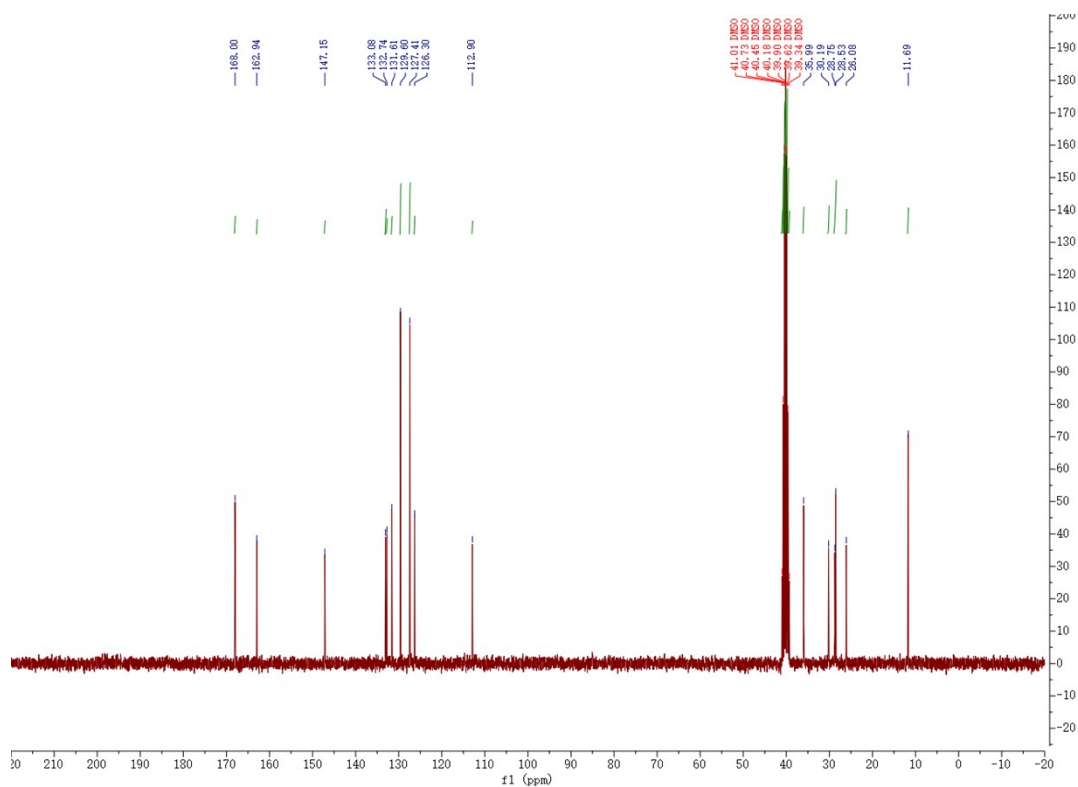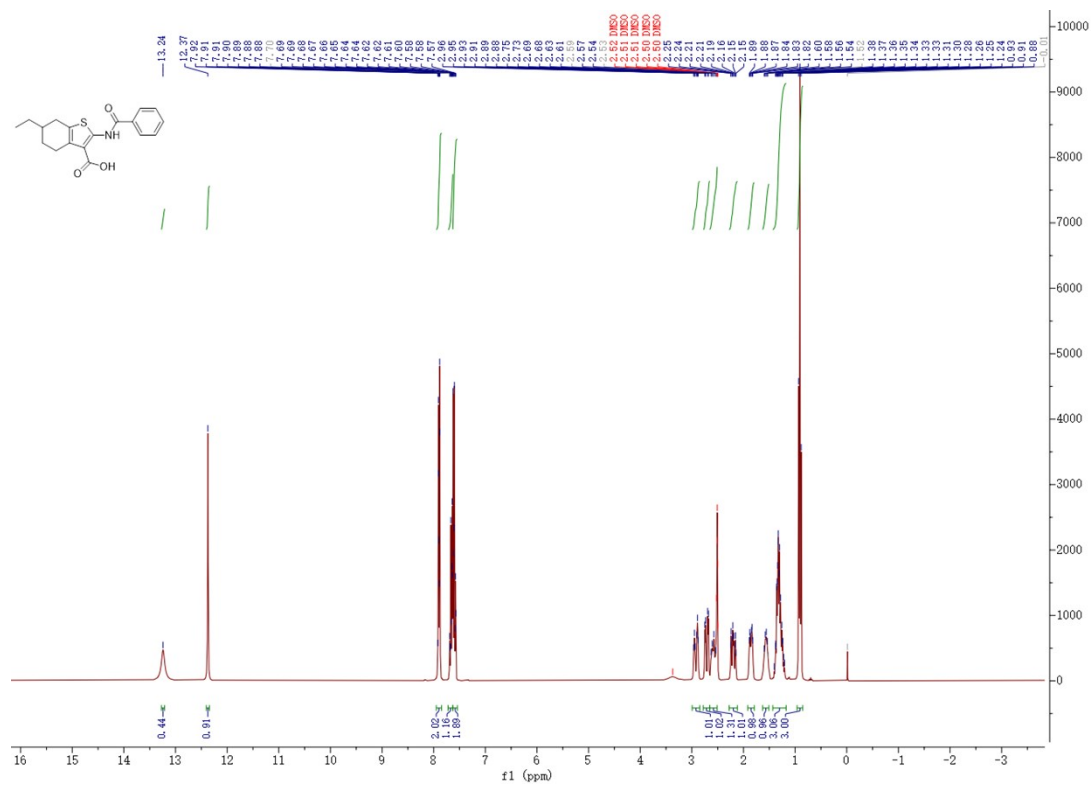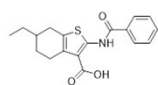

13C NMR spectrum of compound 10. The x-axis represents the chemical shift in ppm (f1), ranging from 210 to -10. The y-axis represents the intensity, ranging from -1000 to 18000. The spectrum shows several peaks in the aromatic region (110-145 ppm), a large solvent peak at 40 ppm, and aliphatic peaks between 20-40 ppm. A list of peak values is provided on the right side of the plot.

| Chemical Shift (ppm) |
|----------------------|
| 167.53               |
| 162.62               |
| 145.89               |
| 133.81               |
| 133.24               |
| 131.73               |
| 130.8                |
| 130.69               |
| 130.55               |
| 128.33               |
| 126.79               |
| 113.43               |
| 40.60 (MSO)          |
| 40.39 (MSO)          |
| 40.19 (MSO)          |
| 39.99 (MSO)          |
| 39.87 (MSO)          |
| 39.76 (MSO)          |
| 39.55 (MSO)          |
| 35.93                |
| 35.17                |
| 28.58                |
| 26.10                |
| 11.81                |

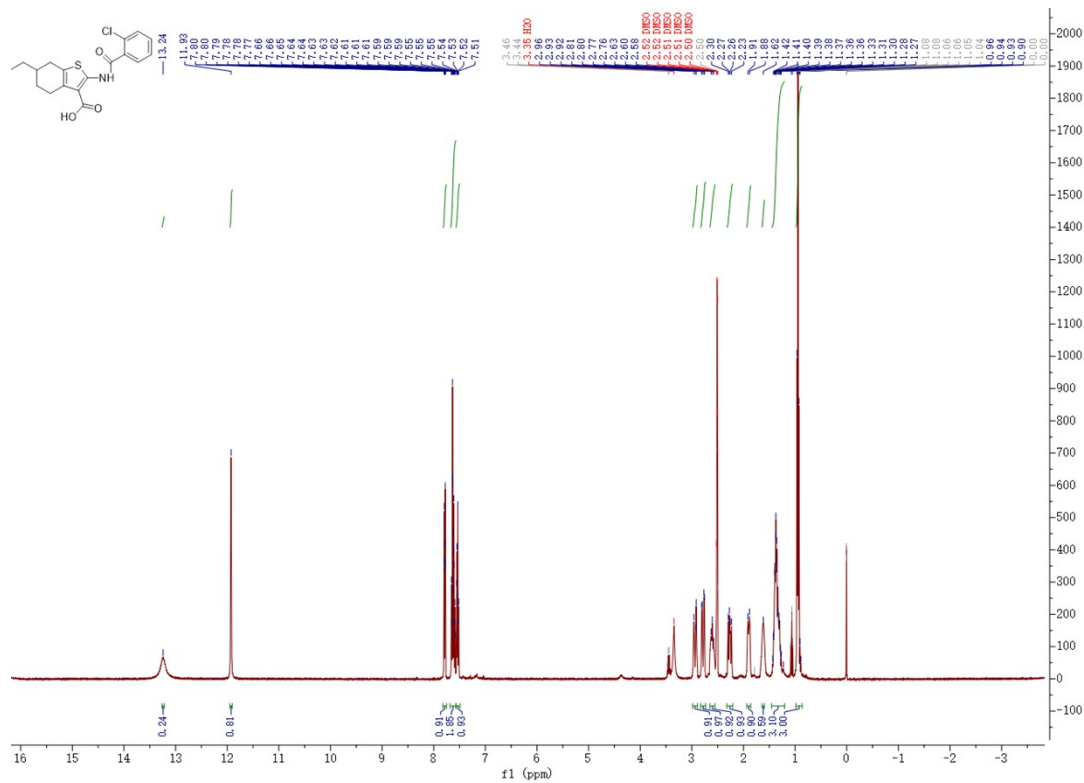

# Compound 3m

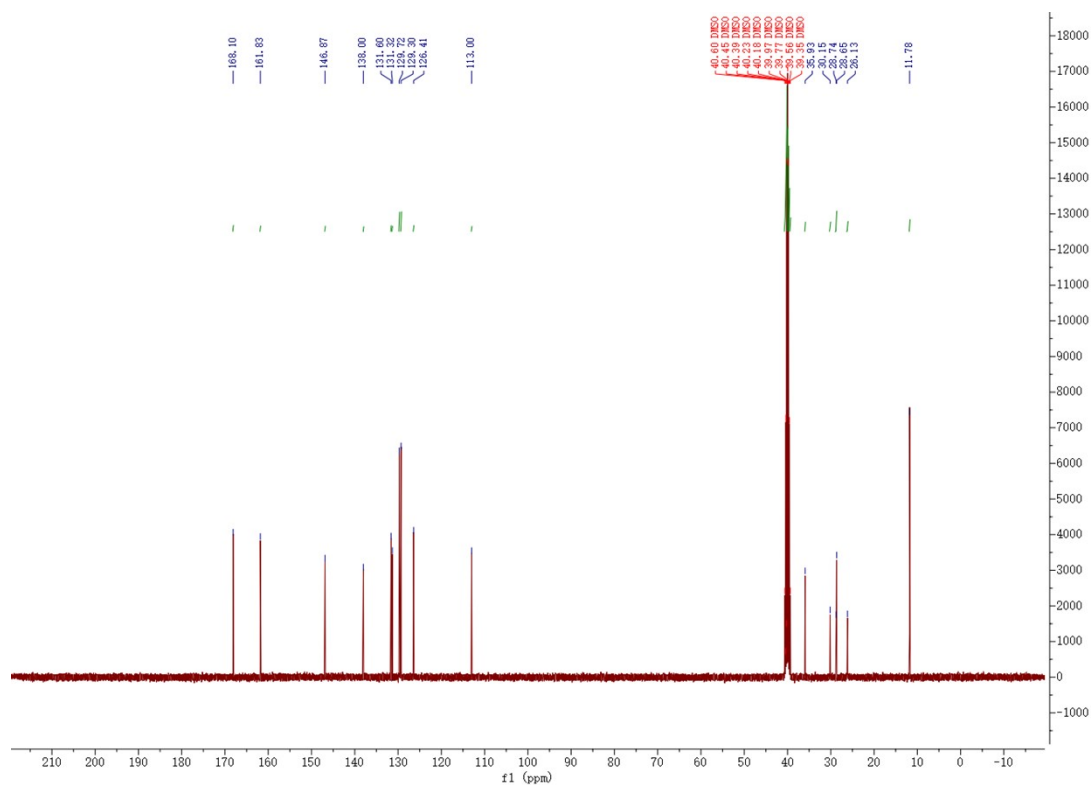

<sup>13</sup>C NMR spectrum of compound 10a in CDCl<sub>3</sub>. The x-axis represents the chemical shift in ppm, ranging from -10 to 210. The y-axis represents the intensity. The spectrum shows several peaks: a triplet for the CDCl<sub>3</sub> solvent at approximately 77 ppm, a cluster of peaks between 110 and 140 ppm, and a cluster of peaks between 160 and 175 ppm. Specific peaks are labeled with their chemical shift values in ppm.

| Chemical Shift (ppm) |
|----------------------|
| 168.12               |
| 166.34               |
| 163.04               |
| 161.07               |
| 131.59               |
| 130.20               |
| 129.17               |
| 128.28               |
| 116.04               |
| 116.62               |
| 112.93               |
| 40.59 (DMSO)         |
| 40.19 (DMSO)         |
| 39.79 (DMSO)         |
| 39.39 (DMSO)         |
| 38.99 (DMSO)         |
| 38.59 (DMSO)         |
| 38.19 (DMSO)         |
| 37.79 (DMSO)         |
| 37.39 (DMSO)         |
| 36.94                |
| 36.54                |
| 36.14                |
| 35.74                |
| 35.34                |
| 34.94                |
| 34.54                |
| 34.14                |
| 33.74                |
| 33.34                |
| 32.94                |
| 32.54                |
| 32.14                |
| 31.74                |
| 31.34                |
| 30.94                |
| 30.54                |
| 30.14                |
| 29.74                |
| 29.34                |
| 28.94                |
| 28.54                |
| 28.14                |
| 27.74                |
| 27.34                |
| 26.94                |
| 26.54                |
| 26.14                |
| 25.74                |
| 25.34                |
| 24.94                |
| 24.54                |
| 24.14                |
| 23.74                |
| 23.34                |
| 22.94                |
| 22.54                |
| 22.14                |
| 21.74                |
| 21.34                |
| 20.94                |
| 20.54                |
| 20.14                |
| 19.74                |
| 19.34                |
| 18.94                |
| 18.54                |
| 18.14                |
| 17.74                |
| 17.34                |
| 16.94                |
| 16.54                |
| 16.14                |
| 15.74                |
| 15.34                |
| 14.94                |
| 14.54                |
| 14.14                |
| 13.74                |
| 13.34                |
| 12.94                |
| 12.54                |
| 12.14                |
| 11.74                |
| 11.34                |
| 10.94                |
| 10.54                |
| 10.14                |
| 9.74                 |
| 9.34                 |
| 8.94                 |
| 8.54                 |
| 8.14                 |
| 7.74                 |
| 7.34                 |
| 6.94                 |
| 6.54                 |
| 6.14                 |
| 5.74                 |
| 5.34                 |
| 4.94                 |
| 4.54                 |
| 4.14                 |
| 3.74                 |
| 3.34                 |
| 2.94                 |
| 2.54                 |
| 2.14                 |
| 1.74                 |
| 1.34                 |
| 0.94                 |
| 0.54                 |
| 0.14                 |
| -0.24                |
| -0.64                |
| -1.04                |
| -1.44                |
| -1.84                |
| -2.24                |
| -2.64                |
| -3.04                |
| -3.44                |
| -3.84                |
| -4.24                |
| -4.64                |
| -5.04                |
| -5.44                |
| -5.84                |
| -6.24                |
| -6.64                |
| -7.04                |
| -7.44                |
| -7.84                |
| -8.24                |
| -8.64                |
| -9.04                |
| -9.44                |
| -9.84                |
| -10.24               |
| -10.64               |
| -11.04               |
| -11.44               |
| -11.84               |
| -12.24               |
| -12.64               |
| -13.04               |
| -13.44               |
| -13.84               |
| -14.24               |
| -14.64               |
| -15.04               |
| -15.44               |
| -15.84               |
| -16.24               |
| -16.64               |
| -17.04               |
| -17.44               |
| -17.84               |
| -18.24               |
| -18.64               |
| -19.04               |
| -19.44               |
| -19.84               |
| -20.24               |
| -20.64               |
| -21.04               |
| -21.44               |
| -21.84               |
| -22.24               |
| -22.64               |
| -23.04               |
| -23.44               |
| -23.84               |
| -24.24               |
| -24.64               |
| -25.04               |
| -25.44               |
| -25.84               |
| -26.24               |
| -26.64               |
| -27.04               |
| -27.44               |
| -27.84               |
| -28.24               |
| -28.64               |
| -29.04               |
| -29.44               |
| -29.84               |
| -30.24               |
| -30.64               |
| -31.04               |
| -31.44               |
| -31.84               |
| -32.24               |
| -32.64               |
| -33.04               |
| -33.44               |
| -33.84               |
| -34.24               |
| -34.64               |
| -35.04               |
| -35.44               |
| -35.84               |
| -36.24               |
| -36.64               |
| -37.04               |
| -37.44               |
| -37.84               |
| -38.24               |
| -38.64               |
| -39.04               |
| -39.44               |
| -39.84               |
| -40.24               |
| -40.64               |
| -41.04               |
| -41.44               |
| -41.84               |
| -42.24               |
| -42.64               |
| -43.04               |
| -43.44               |
| -43.84               |
| -44.24               |
| -44.64               |
| -45.04               |
| -45.44               |
| -45.84               |
| -46.24               |
| -46.64               |
| -47.04               |
| -47.44               |
| -47.84               |
| -48.24               |
| -48.64               |
| -49.04               |
| -49.44               |
| -49.84               |
| -50.24               |
| -50.64               |
| -51.04               |
| -51.44               |
| -51.84               |
| -52.24               |
| -52.64               |
| -53.04               |
| -53.44               |
| -53.84               |
| -54.24               |
| -54.64               |
| -55.04               |
| -55.44               |
| -55.84               |
| -56.24               |
| -56.                 |

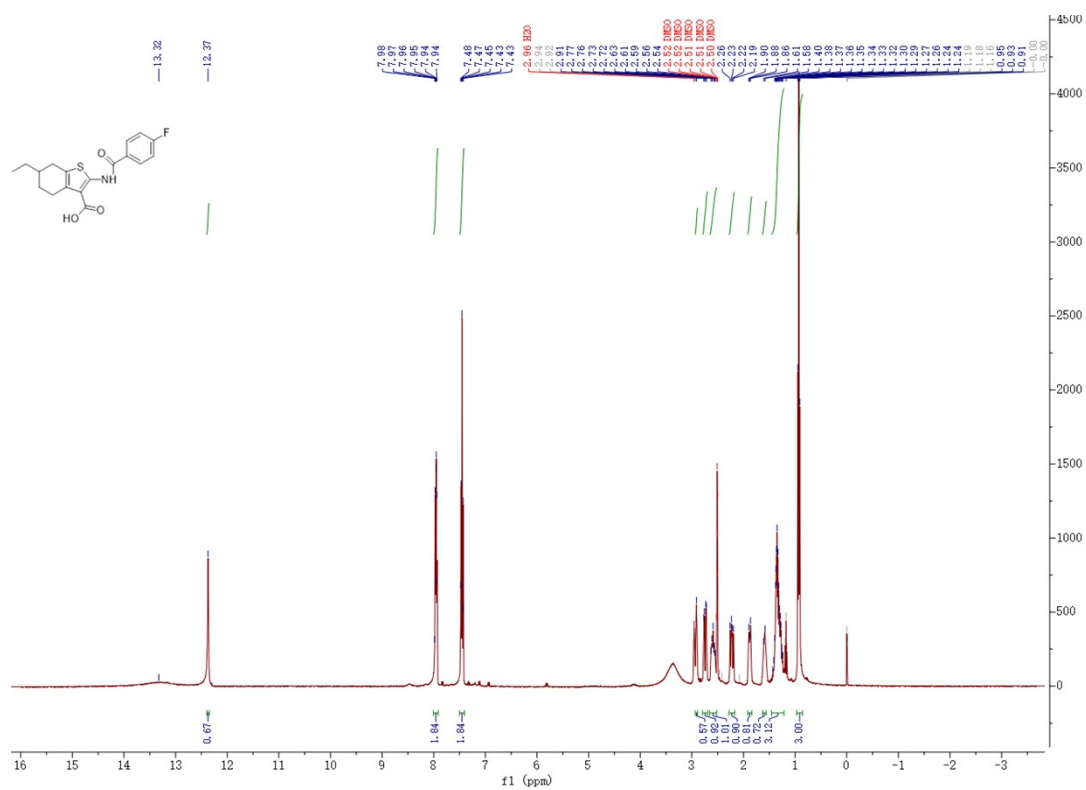

# Compound 3o

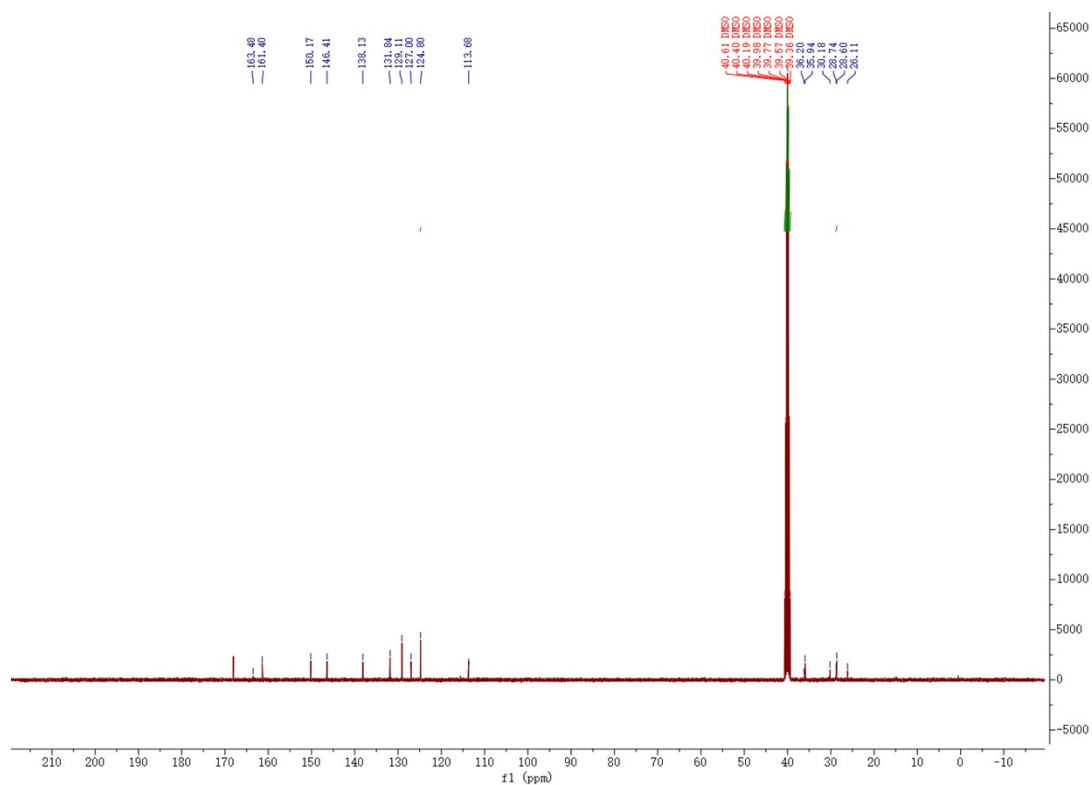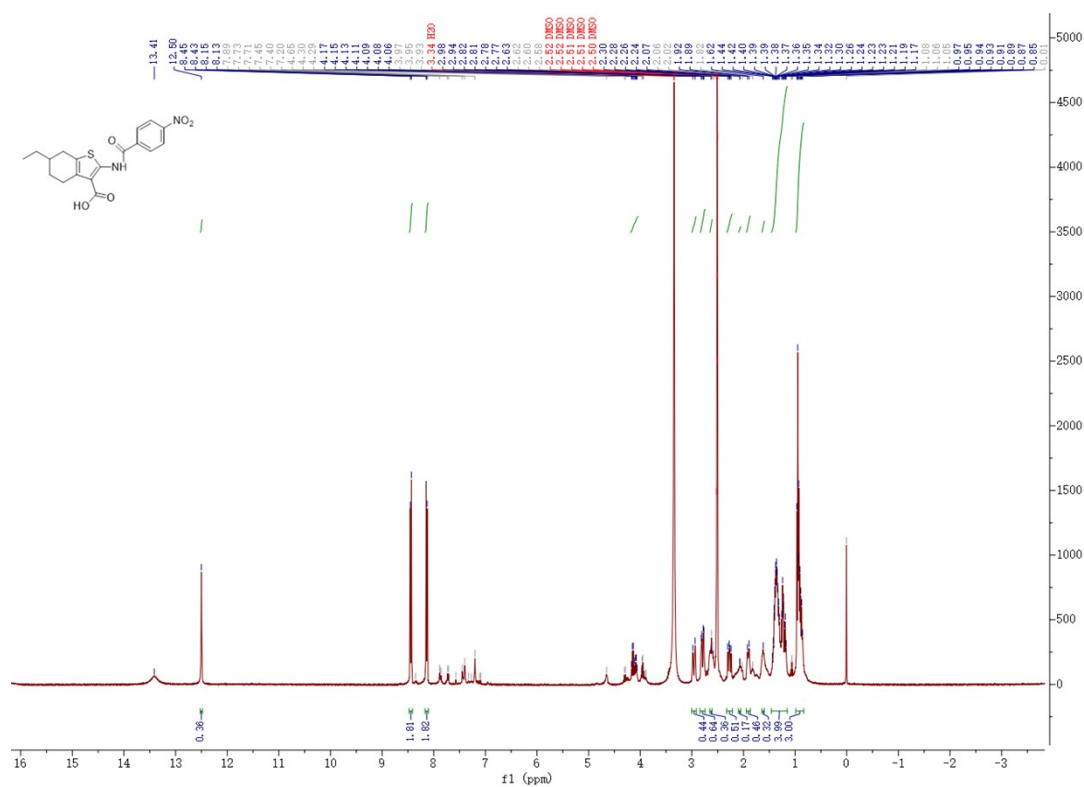



# Compound 3p

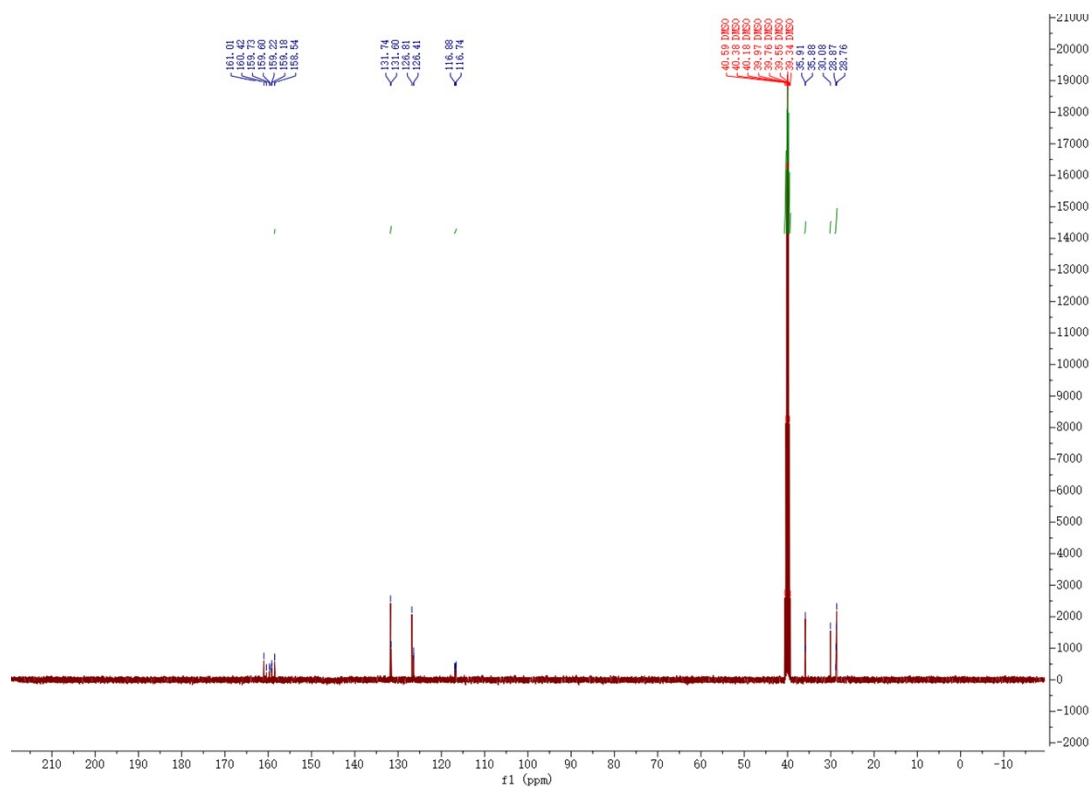

# Compound 3q

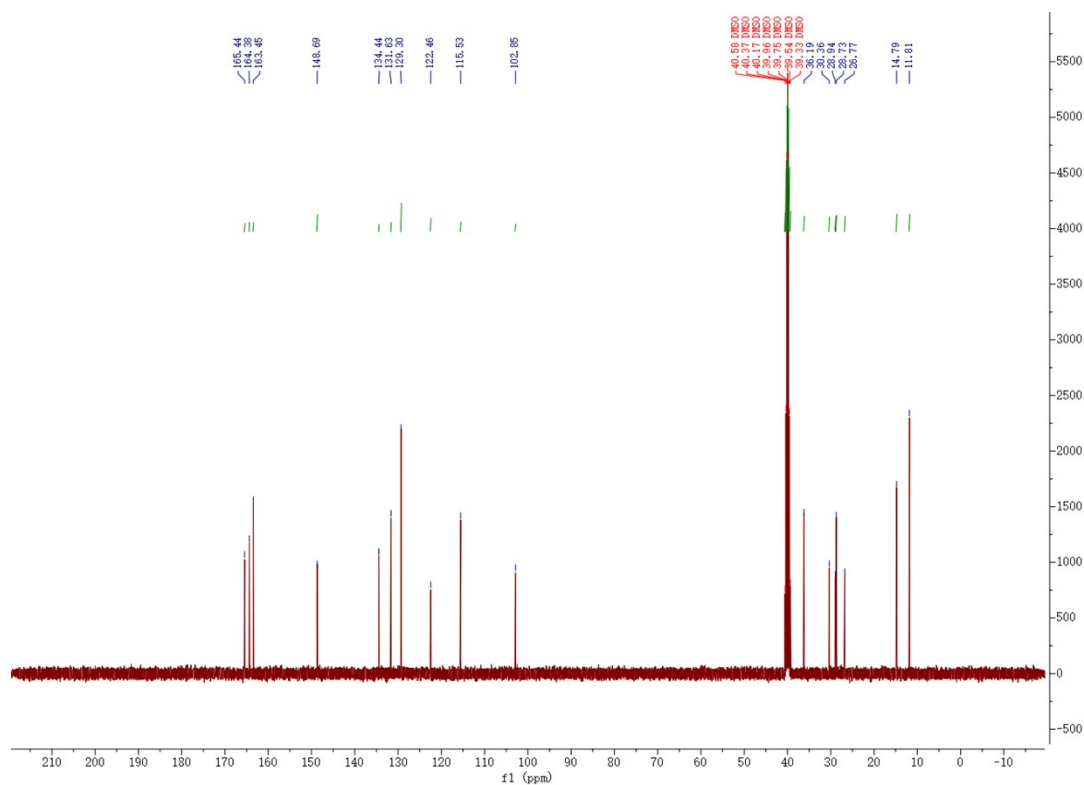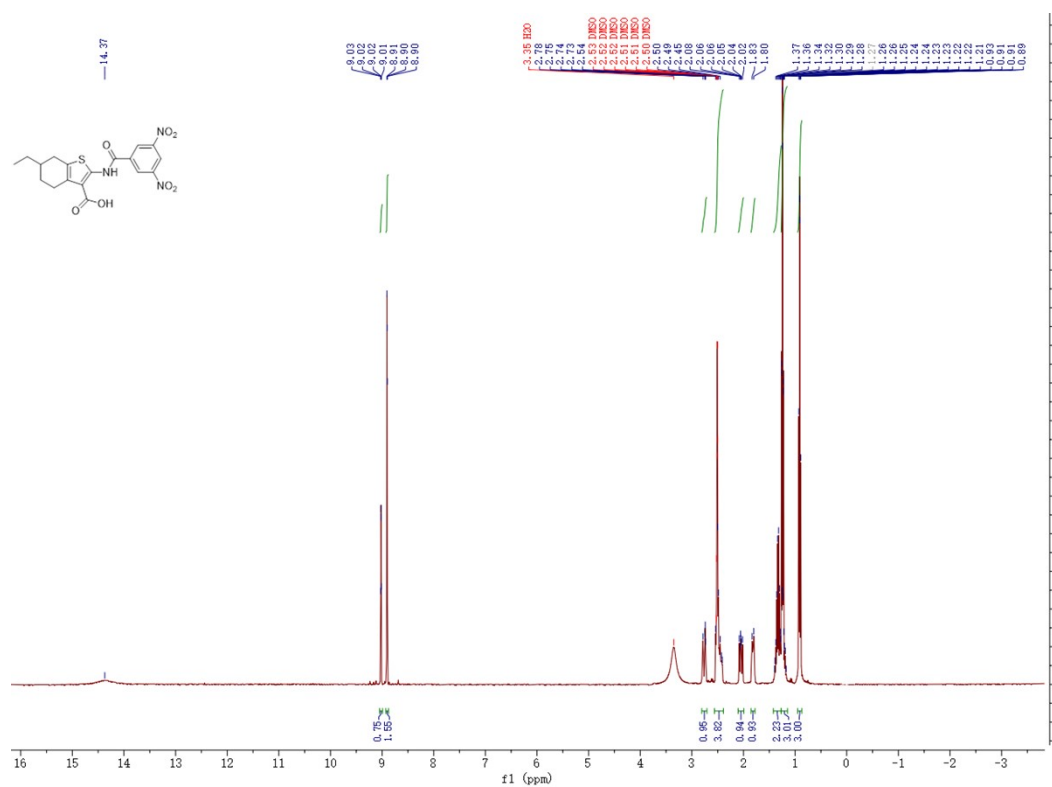

# Compound 3r

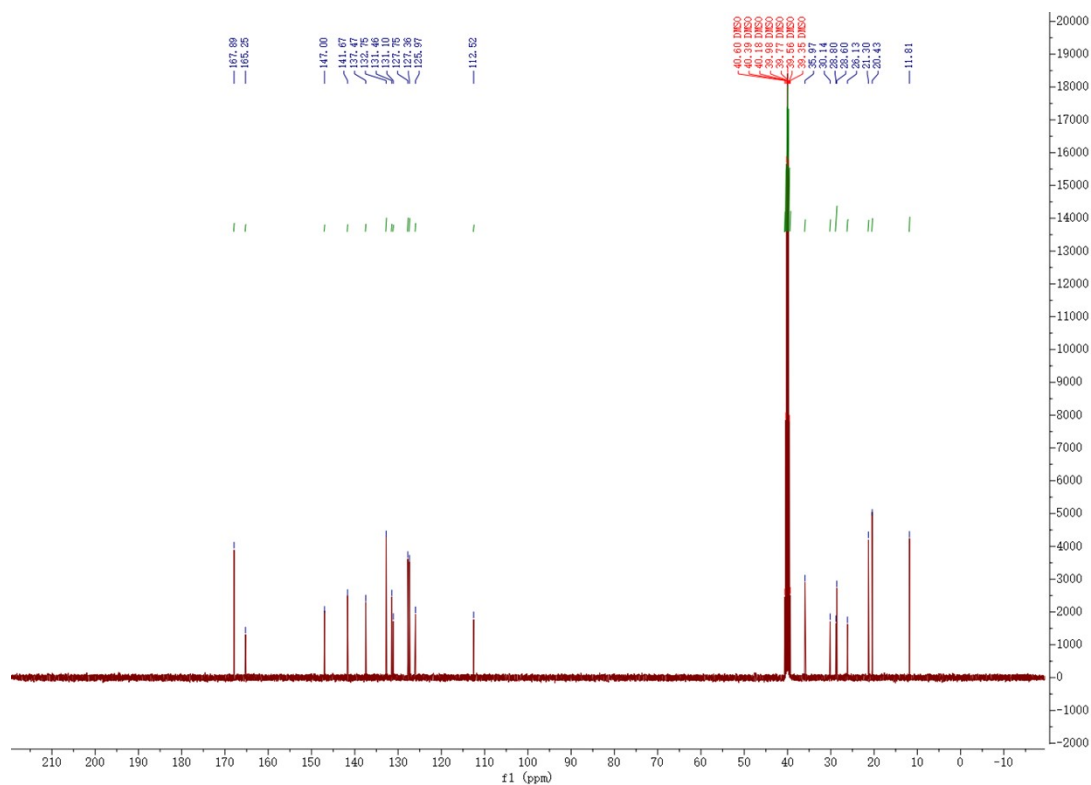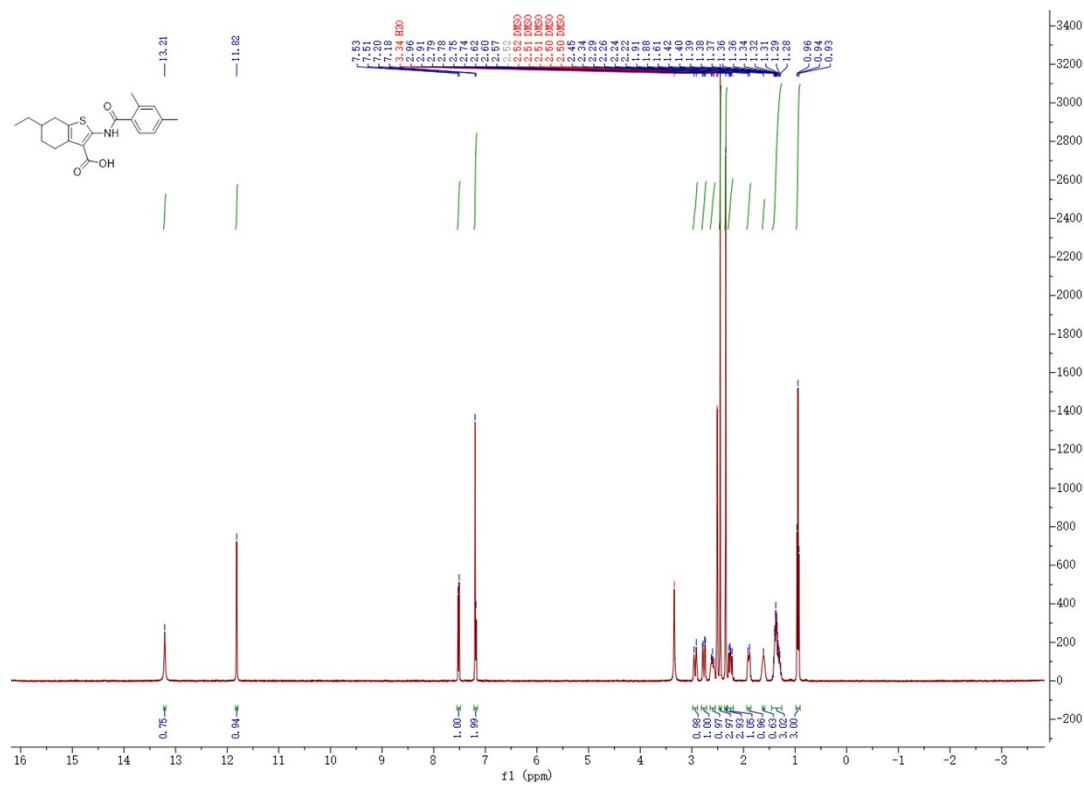

Supplement: d2md00373b1.pdf [file d2md00373b1.pdf]
